# Supplementary material for: Nitrogen-doped carbon coated zinc selenide nanoparticles derived from metal–organic frameworks as high-rate and long-life anode materials for half/full sodium-ion batteries
Source: Royal Society of Chemistry journal article supplement (doi:10.1039/d4qi01928h), 2024-01-01
Supplement: d4qi01928h1.pdf [file d4qi01928h1.pdf]

Nitrogen-Doped carbon coated zinc selenide nanoparticles derived from metal-organic framework as high-rate and long-life anode materials for half/full sodium-ion batteries

Yunxiu Wang,<sup>a</sup> Yilin Wang,<sup>b</sup> Zenghui Cai,<sup>a</sup> Zhijiang Yu,<sup>a</sup> Hao Dong,<sup>d</sup> Yifan Zhang,<sup>a</sup>  
Yanli Zhou,<sup>a</sup> Xintao Zhang,<sup>a</sup> Yanjun Zhai<sup>\*c</sup>, Fuyi Jiang<sup>\*a</sup> and Caifu Dong<sup>\*a</sup>

<sup>a</sup> School of Environmental and Material Engineering, Yantai University, Yantai 264005, China.

<sup>b</sup> Trier College of Sustainable Technology, Yantai University, Yantai 264005, China.

<sup>c</sup> School of Chemistry and Chemical Engineering, Liaocheng University, Liaocheng 252059, China.

<sup>d</sup> Shandong Laboratory of Advanced Materials and Green Manufacturing at Yantai, Yantai, 264006, China.

\*Corresponding author. E-mail: Yanjun Zhai, zhaiyanjun@lcu.edu.cn; Fuyi Jiang, fyjiang@ytu.edu.cn; Caifu Dong, dongcf@ytu.edu.cn

**Keywords:** Metal-organic frameworks, ZnSe@NC, sodium ion batteries, anode, long cycle life

## Content

### Figure captions:

**Table S1.** Crystal data of compound ZnL.

**Fig. S1.** TGA curve of the ZnL.

**Fig. S2.** (a) FESEM image of ZnL. (b) SEM image of ZnL and the corresponding elemental mappings of Zn, N, C and O elements (as labeled). (c) FEEM of ZnL after ball-milling. (d) FT-IR spectra of ZnL before and after ball-milling.

**Fig. S3.** Nitrogen adsorption–desorption isotherm (a) and the corresponding pore size distribution curve (b) of ZnSe@NC.

**Fig. S4.** High resolution XPS spectrum of (a) Zn, (b) Se.

**Fig. S5.** (a) Nyquist plot of ZnSe@NC at different mass of the active material. (b) The plot of  $Z'$  versus  $\omega^{-1/2}$  of ZnSe@NC electrode at different mass of the active material.

**Table S2.** Electrochemical performance comparisons of the ZnSe@C electrode with those of the previously reported ZnSe for SIBs.

**Fig. S6.** The equivalent circuit for different number of cycles at open-circuit voltage, 20<sup>th</sup>, 50<sup>th</sup>.

**Fig. S7.** (a) GITT curves of ZnSe@NC for the 20<sup>th</sup> cycles. A single GITT titration curve during the charging process of ZnSe@NC for the 4<sup>th</sup> (b) and 20<sup>th</sup> (c) cycles.

**Fig. S8.** The plot of voltage vs. root of pulse time ( $\tau_{1/2}$ ) for ZnSe@NC electrodes at different cycles (a) 4<sup>th</sup> cycle (b) 20<sup>th</sup> cycle.

**Fig. S9.** The reaction impedance during (a) discharge and (b) charge processes.

**Fig. S10.** (a) FESEM image of NVP/rGO. XRD patterns (b) and cycling performance (c) of NVP@rGO at 0.3 A g<sup>-1</sup>.

**Table S1.** Crystal data of compound ZnL.

| Compound                                  | ZnL                                                               |
|-------------------------------------------|-------------------------------------------------------------------|
| Chemical formula                          | C <sub>24</sub> H <sub>17</sub> N <sub>3</sub> O <sub>13</sub> Zn |
| Formula weight                            | 620                                                               |
| Crystal system                            | monoclinic                                                        |
| Space group                               | P 1 21/n 1                                                        |
| a[Å]                                      | 9.0360(9)                                                         |
| b[Å]                                      | 8.2692(8)                                                         |
| c[Å]                                      | 11.6421(11)                                                       |
| a/b                                       | 1.0927                                                            |
| b/c                                       | 0.7103                                                            |
| c/a                                       | 1.2881                                                            |
| β[°]                                      | 100.926(2)                                                        |
| Volume [Å <sup>3</sup> ]                  | 854.13(14)                                                        |
| Z, Calculated density[Mg/m <sup>3</sup> ] | 4                                                                 |

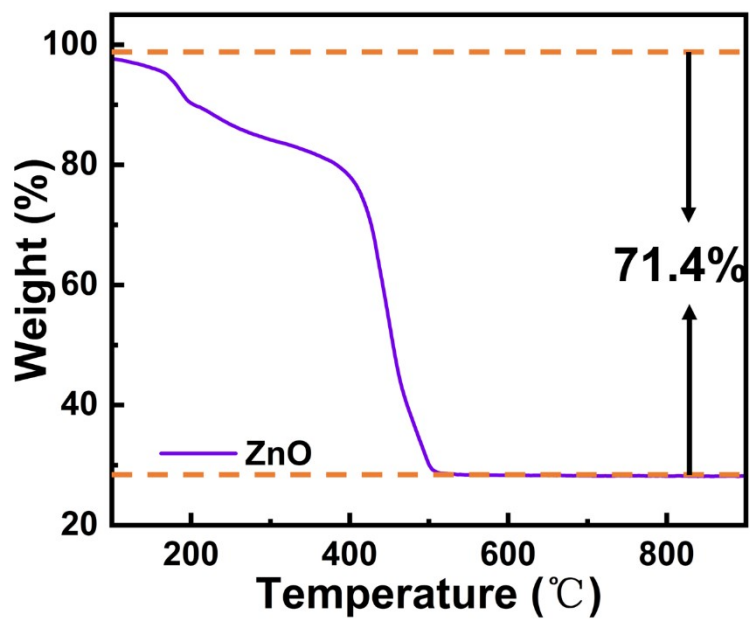

Fig. S1. TGA curve of the ZnL.

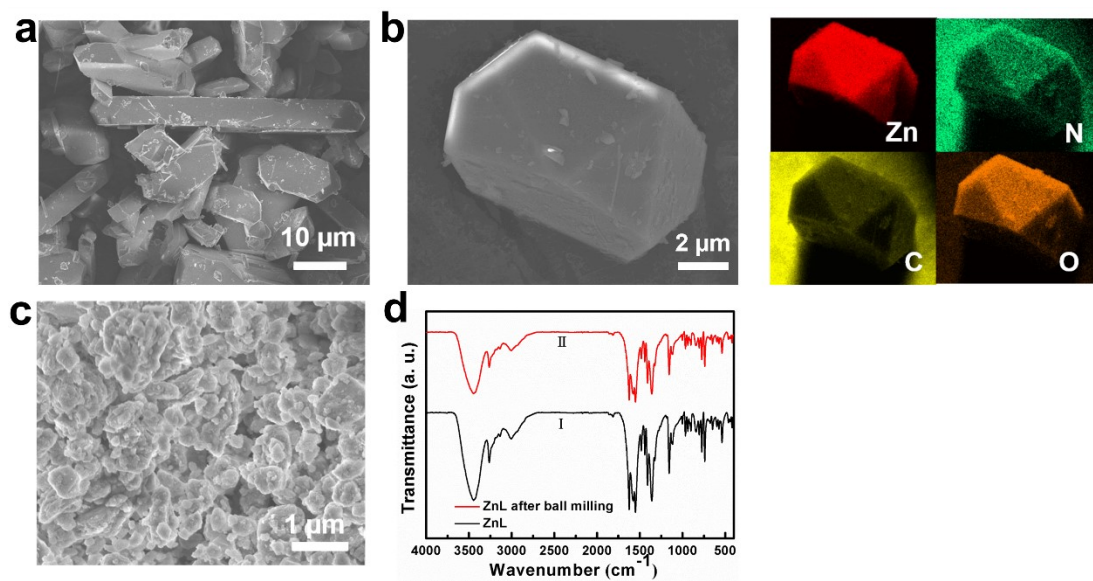

**Fig. S2.** (a) FESEM image of ZnL. (b) SEM image of ZnL and the corresponding elemental mappings of Zn, N, C and O elements (as labeled). (c) FEEM of ZnL after ball-milling. (d) FT-IR spectra of ZnL before and after ball-milling.

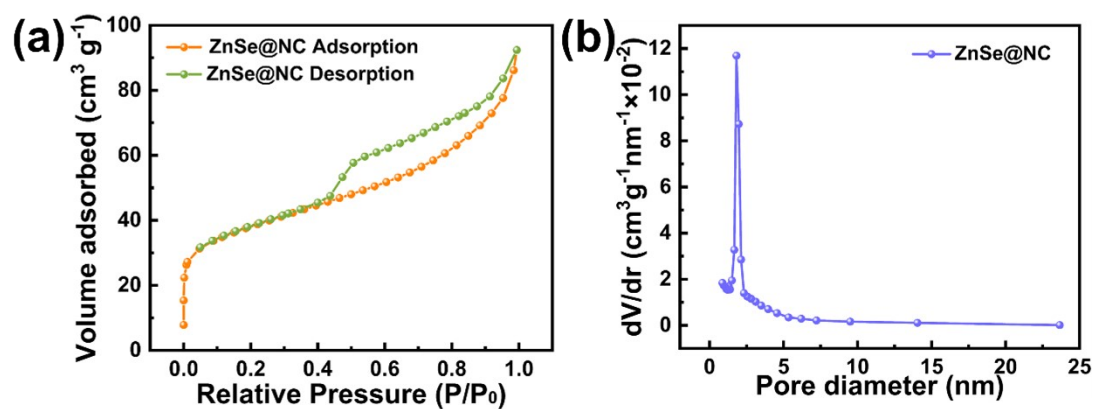

**Fig. S3.** Nitrogen adsorption–desorption isotherm (a) and the corresponding pore size distribution curve (b) of ZnSe@NC.

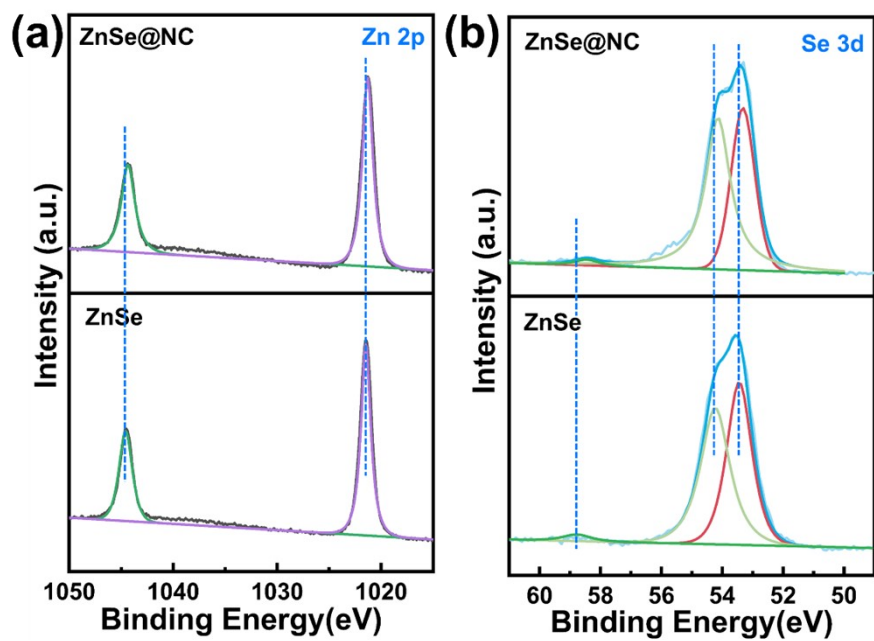

**Fig. S4.** High resolution XPS spectrum of (a) Zn, (b) Se.

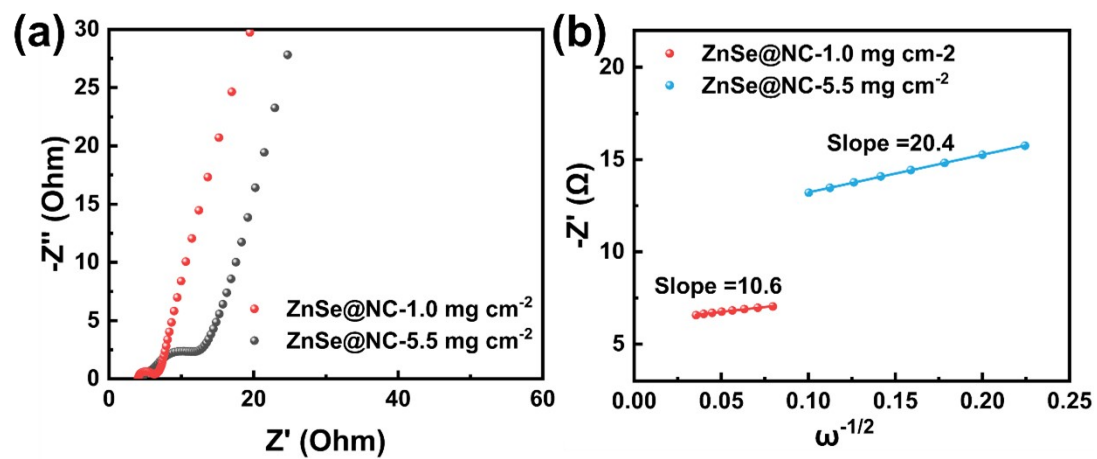

**Fig. S5.** (a) Nyquist plot of ZnSe@NC at different mass of the active material. (b) The plot of  $Z'$  versus  $\omega^{-1/2}$  of ZnSe@NC electrode at different mass of the active material.



**Table S2.** Electrochemical performance comparisons of the ZnSe@NC electrode with those of the previously reported ZnSe for SIBs.

| Electrode      | Current<br>(A g <sup>-1</sup> ) | Capacity<br>(mA h g <sup>-1</sup> ) | Cycle<br>number | Initial<br>Coulombic<br>efficiency | Ref/year       |
|----------------|---------------------------------|-------------------------------------|-----------------|------------------------------------|----------------|
| ZnSe-rGO       | 0.1                             | 259.5                               | 50              | 73.48%                             | 1/2018         |
| ZnSe/HNC       | 0.5                             | 251.1                               | 500             | 60.6%                              | 2/2020         |
| ZnSe-rGO       | 0.1                             | 276.6                               | 100             | 71.1%                              | 3/2021         |
| ZnSe@C         | 0.1                             | 284.7                               | 60              | 71.7%                              | 4/2022         |
| ZnSe@NC/rGO    | 0.1                             | 365.6                               | 50              | 45.3%                              | 5/2022         |
| ZnSe@NC NFs    | 0.1                             | 336.8                               | 150             | 66.3%                              | 6/2023         |
| ZnSe@CNFs      | 0.1                             | 241.3                               | 200             | 69.5%                              | 7/2024         |
| ZnSe-rGO       | 0.5                             | 323.27                              | 160             | 71.6%                              | 8/2024         |
| <b>ZnSe@NC</b> | <b>0.3</b>                      | <b>470.8</b>                        | <b>100</b>      | <b>81.82%</b>                      | <b>Ourwork</b> |
| <b>ZnSe@NC</b> | <b>4</b>                        | <b>317.6</b>                        | <b>500</b>      | <b>73.37%</b>                      | <b>Ourwork</b> |

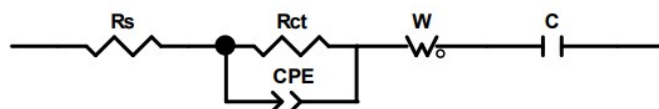

**Fig. S6.** The equivalent circuit for different number of cycles at open-circuit voltage, 20<sup>th</sup>, 50<sup>th</sup>.

**Table S3.** EIS fitting results of ZnSe@NC at open-circuit voltage, 20 cycles, 50 cycles for SIBs.

| Samples  | $R_s$ | $R_{ct}$ |
|----------|-------|----------|
| Fresh    | 3.92  | 2.045    |
| Cycle-20 | 3.665 | 6.641    |
| Cycle-50 | 4.337 | 5.643    |

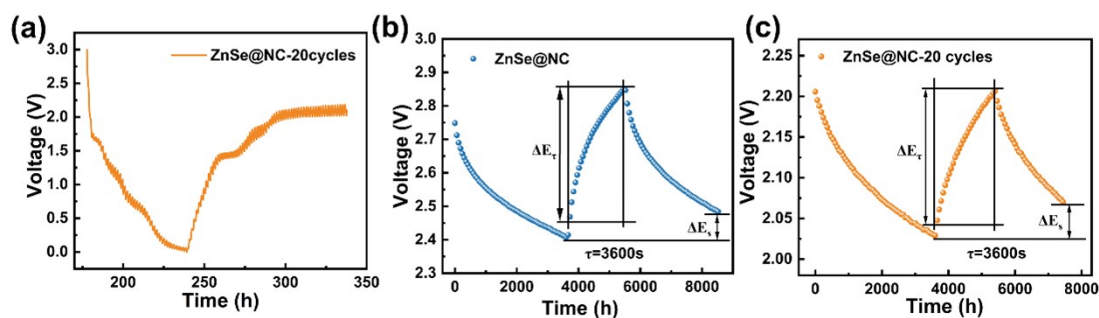

**Fig. S7.** (a) GITT curves of ZnSe@NC for the 20<sup>th</sup> cycles. A single GITT titration curve during the charging process of ZnSe@NC for the 4<sup>th</sup> (b) and 20<sup>th</sup> (c) cycles.

The GITT test was performed in a voltage range of 0.01–3 V. Prior to GITT measurement, the assembled cells were charged/discharged at  $0.2 \text{ A g}^{-1}$  for 3 cycles to activate the battery. During the GITT test in the 4<sup>th</sup> cycle, the cell was charged or discharged at  $20 \text{ mA g}^{-1}$  for 30 min, then followed by a 60 min open circuit step to allow relaxation back to equilibrium, the procedure was repeated until the charge (or discharge) voltage reached 3.0 V (0.01 V).

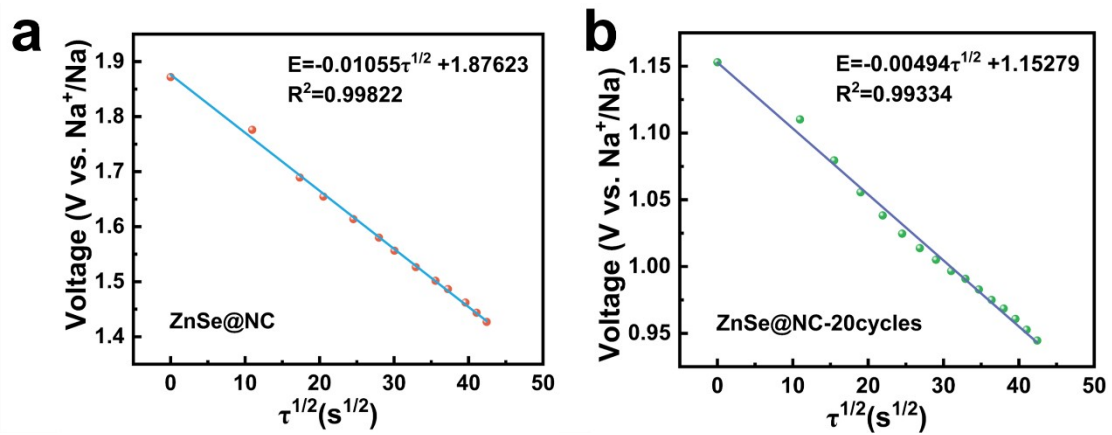

**Fig. S8.** The plot of voltage vs. root of pulse time ( $\tau_{1/2}$ ) for ZnSe@NC electrodes at different cycles (a) 4<sup>th</sup> cycle (b) 20<sup>th</sup> cycle.

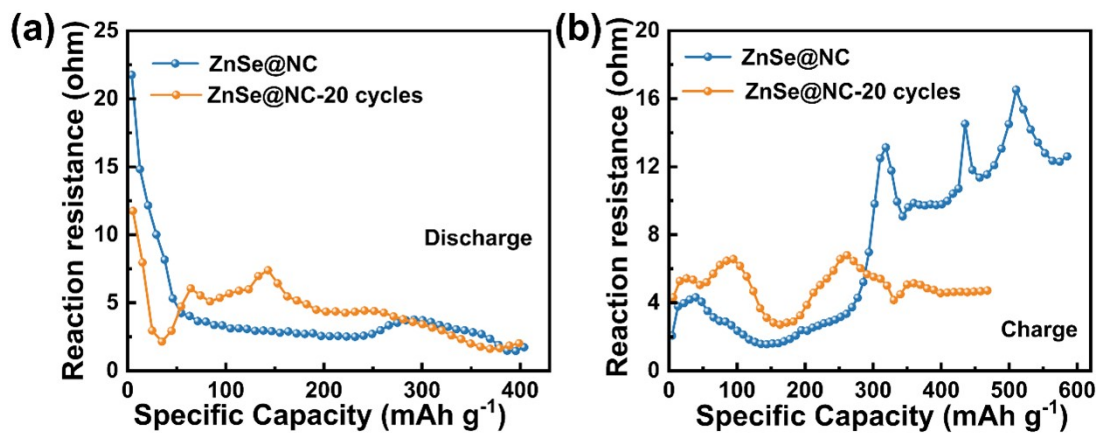

Fig. S9. The reaction impedance during (a) discharge and (b) charge processes.

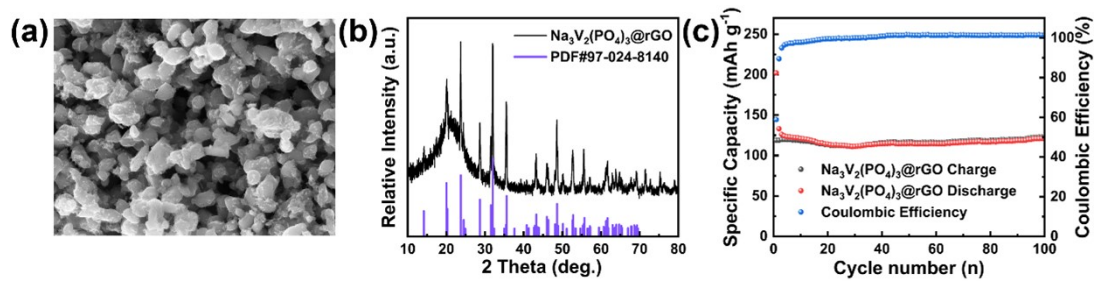

**Fig. S10.** (a) FESEM image of NVP/rGO. XRD patterns (b) and cycling performance (c) of NVP@rGO at  $0.3 \text{ A g}^{-1}$ .

## References

- 1 X. Cao, A. J. Li, Y. Yang, and J. T. Chen, ZnSe Nanoparticles Dispersed in Reduced Graphene Oxides with Enhanced Electrochemical Properties in Lithium/Sodium Ion Batteries, *RSC Adv.*, 2018, **8**, 25734-25744.
- 2 M. Jia, Y. H. Jin, C. C. Zhao, P. Z. Zhao, and M. Q. Jia, ZnSe nanoparticles decorated with hollow N-doped carbon nanocubes for high-performance anode material of sodium ion batteries, *J Alloys Compd.*, 2020, **831**, 154749.
- 3 M. Jia, Y. H. Jin, C. C. Zhao, Q. Q. Chang, P. Z. Zhao, H. Wang, and M. Q. Jia, ZnSe with nanostructure embedded in graphene nanosheets with elevated electrochemical performance for anode material of sodium ion battery, *J Alloys Compd.*, 2021, **854**, 157318.
- 4 J. Yuan, J. C. Zhao, T. M. Lu, L. J. Zhang, J. L. Xu, and D. R. Chu, ZnSe@C core-shell microspheres as potential anode material for sodium ion batteries, *Colloids Surf A Physicochem Eng Asp.*, 2022, **641**, 128549.
- 5 L. T. Zhang, H. G. Zhao, L. M. Dai, F. L. Yao, Y. Huang, W. K. Xue, J. W. Zhu, and J. W. Sun, Rational designed hierarchical dual carbon protected ZnSe anode for advanced sodium-ion hybrid capacitors, *J Energy Storage*, 2022, **52**, 104970.
- 6 D. Huang, D. X. Wu, J. X. Zhu, J. Y. Xie, J. P. Wu, and J. J. Liang, One-dimensional ZnSe@N-doped carbon nanofibers with simple electrospinning route for superior Na/K-ion storage, *Chin. Chem. Lett.*, 2023, **34**, 107416.
- 7 B. Y. Liu, L. Wang, W. Q. Liu, E. Z. Ren, Z. Y. Wang, Q. Zhang, J. X. Chen, and Y. P. Zeng, In-situ rooting ZnSe nanoparticles in N-doped carbon nanofibers for sodium ion batteries with ultra-long cycle life, *Mater. Lett.*, 2024, **371**, 136931.
- 8 Y. Jin, H. Seong, J. H. Moon, G. Kim, H. Yoo, T. Jung, S. K. Kim, S. Y. Cho, and J. Choi, Synthesized nanosphere ZnSe and reduced graphene oxide as anode materials for sodium-ion batteries: Analysis on phase transition and storage mechanism, *App. Surf. Sci.*, 2024, **670**, 160606.
